# Supplementary material for: Immunosuppressive therapy for pediatric aplastic anemia: a North American Pediatric Aplastic Anemia Consortium study
Source: PubMed Central journal article supplement — Haematologica. 2019 Apr 4;104(10):1974–83. doi: 10.3324/haematol.2018.206540 (PMC6886407; doi:10.3324/haematol.2018.206540), 2019-10
Supplement: HAEMATOL-2018-206540v3-Rogers-01.pdf [file HAEMATOL-2018-206540v3-Rogers-01.pdf]

# Response to immunosuppressive therapy and long-term outcomes for pediatric severe aplastic anemia

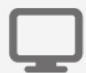

Retrospective study (data from 2002-2014)

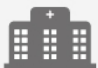

25 institutions in the North American Pediatric Aplastic Anemia Consortium (NAPAAC)

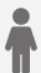

314 pediatric patients (1-20 years) diagnosed with acquired severe aplastic anemia (SAA) and treated with immunosuppressive therapy (IST) with a minimum of two year-follow up

## Treatments

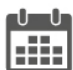

Median follow-up

62 months

## Response to IST

-  **264** Horse anti-thymocyte globulin + cyclosporine (hATG+CYA)
-  **15** Horse anti-thymocyte globulin + Tacrolimus (hATG+Tacro)
-  **15** Rabbit anti-thymocyte globulin (rATG) + Tacro or CYA
-  **19** Cyclophosphamide (CTX)
-  **1** Unspecified ATG+CYA

|                            | All treatments | 95% CI     | hATG+CYA | 95% CI     |
|----------------------------|----------------|------------|----------|------------|
| Complete response          | 60.2 %         | 54.5, 65.7 | 59.8 %   | 53.7, 65.8 |
| Deep response              | 67.5 %         | 62.0, 72.7 | 68.2 %   | 62.2, 73.8 |
| 5-year overall survival    | 92 %           | 88, 95     | 93 %     | 89, 96     |
| 5-year event free survival | 62 %           | 56, 68     | 64 %     | 57, 69     |
